1 **Modelling vasopressin synthesis and storage dynamics during prolonged osmotic**  
2 **challenge and recovery based on activity dependent upregulation of mRNA**  
3 **transcription**

4

5 Duncan J. MacGregor

6 *Centre for Discovery Brain Sciences, University of Edinburgh, George Square*

7 *Edinburgh EH8 9XD, UK*

8

9 E-mail: [duncan.macgregor@ed.ac.uk](mailto:duncan.macgregor@ed.ac.uk)

10

11 **Abstract**

12

13 Hypothalamic vasopressin neurons are neuroendocrine cells which form part of the  
14 homeostatic systems that maintain osmotic pressure. In response to synaptic inputs  
15 encoding osmotic pressure and changes in plasma volume, they generate spike  
16 triggered secretion of peptide hormone vasopressin from axonal terminals in the  
17 posterior pituitary. The thousands of neurons' secretory signals generate a summed  
18 plasma vasopressin signal acting at the kidneys to regulate water loss. Vasopressin is  
19 synthesised in cell bodies, packaged into vesicles, and transported to large stores in  
20 the pituitary terminals. Supported by activity-dependent upregulation of synthesis and  
21 transport, these stores can maintain a secretion response for several days of elevated  
22 osmotic pressure, tested by dehydration or salt loading. However, despite upregulated  
23 synthesis, stores gradually decline during sustained challenge, followed by a slow  
24 recovery. With no evidence of a store encoding feedback signal, previous modelling  
25 explained these synthesis dynamics based on activity-dependent upregulation of  
26 transcription and mRNA content. Here this model is adapted and integrated into our  
27 existing spiking and secretion model to generate a neuronal population model, able to  
28 simulate the secretion, store depletion, and replenishment, response to sustained  
29 osmotic challenge, matching the dynamics observed experimentally and making  
30 functional predictions for the cell body mechanisms.

31

32

33

## 34 Introduction

35

36           Magnocellular vasopressin neurons, of the supraoptic and paraventricular  
37 nuclei of the hypothalamus, in response to input signals that encode osmotic pressure  
38 and plasma volume, synthesise and secrete the antidiuretic hormone vasopressin.  
39 Vasopressin in its antidiuretic role is a core element of the homeostatic system that  
40 maintains osmotic pressure (water/salt balance), signalling the kidneys to regulate  
41 how much water is retained. Acting as a heterogeneous population, these neurons are  
42 able to maintain a constantly functioning physiological signal over lifelong periods of  
43 time. To sustain such a signal the system must be both very robust and efficient. It  
44 must also be able to respond rapidly to large changes in demand.

45           Vasopressin is synthesised in the neuronal cell bodies and packaged into large  
46 dense core vesicles that are transported down the axons to the posterior pituitary,  
47 where the vesicles are stored in axon swellings and terminals that form larger reserve  
48 and smaller releasable pools. We have previously modelled the spiking and secretion  
49 mechanisms of these neurons (MacGregor and Leng, 2012, 2013), including the  
50 dynamics of these pools. Here we build and integrate with our existing model, a  
51 quantitative model of the synthesis mechanisms, to better understand how the  
52 properties of these neurons relate to their function on long timescales.

53           In normal (basal) conditions mammals drink and ingest sodium (in the diet)  
54 intermittently, but constantly lose water through respiration and perspiration. Under  
55 homeostatic regulation, osmotic pressure fluctuates around a ‘set point’; increases  
56 above this will be corrected by increased sodium excretion in urine, by increased  
57 thirst, and to compensate lack of availability or intermittent ingestion of water, by  
58 secreting vasopressin to concentrate the urine and minimise water loss. Falling below  
59 this set point occurs less commonly, when excess water has been consumed, or salt  
60 has been lost. Both tonic signalling and a response to perturbations must be  
61 maintained, and accordingly there is an almost continuous depletion of the pituitary  
62 vasopressin stores, which must be replenished by the synthesis, packaging, and  
63 transport of new vasopressin vesicles.

64           In conscious, normally hydrated rats, as in humans, the basal vasopressin  
65 plasma concentration is  $\sim 1$  pg/ml (Robertson, Shelton and Athar, 1976; Verbalis,  
66 Baldwin and Robinson, 1986) and maximal antidiuresis is observed at a concentration

67 of about 10 pg/ml. At concentrations higher than this, vasopressin continues to have  
68 an important role by its vasoconstrictor actions, which compensate for loss of fluid  
69 volume in conditions of dehydration. The pituitary vasopressin stores are large,  
70 between 1 and 2  $\mu\text{g}$  (Leng and Ludwig, 2008), sufficient to maintain basal levels for  
71 around a month (Jones and Pickering, 1972). These large stores buffer against rapid  
72 increases in demand, but the rate of synthesis is also activity dependent, upregulating  
73 production in response to sustained increase in demand, and downregulating  
74 production in response to sustained low demand (Verbalis, Baldwin and Robinson,  
75 1986). The system thus attempts to match supply and demand, minimising waste  
76 whilst protecting its stores (MacGregor, Clayton and Leng, 2013).

77 Upregulation of synthesis is limited however, and under conditions of  
78 sustained high demand, such as limited water access, the stores are depleted, falling to  
79 less than 30% after five days (Jones and Pickering, 1969). The activity-dependent  
80 synthesis rate is no longer able to match activity dependent secretion. When demand  
81 and the stimulating osmotic signal has returned to normal, the stores are gradually  
82 replenished, over a course of days (Young and Van Dyke, 1968). At this point the rate  
83 of synthesis must be exceeding the activity-dependent secretion rate.

84 Building a system, the simplest way to do this would be to have some  
85 feedback signal of store depletion. However we have no evidence for such a signal.  
86 The pituitary stores at the neurons' secretory terminals are distant from the cell body  
87 and highly distributed among thousands of release sites, making the measuring and  
88 transmission of such a signal very difficult. The alternative is that some property of  
89 the synthesis mechanisms forms a memory of the challenge, sufficient to maintain  
90 higher synthesis rates beyond the direct stimulus. The best candidate for this is the  
91 pool of vasopressin mRNA. The mRNA pool increases in size several fold in response  
92 to prolonged challenge (Sherman, McKelvy and Watson, 1986). This mechanism was  
93 extensively investigated using both experimental and modelling work by a group in  
94 Pittsburgh in the late 1980s and early 1990s (Robinson *et al.*, 1989; Fitzsimmons *et*  
95 *al.*, 1992; Robinson and Fitzsimmons, 1993). They tested several alternative models  
96 (Fitzsimmons *et al.*, 1992) and showed that the best match to observed dynamics of  
97 store depletion and replenishment uses an mRNA pool dependent rate of synthesis,  
98 combined with activity dependent upregulation of transcription. During a prolonged  
99 challenge the simulated mRNA pool increases in size, and following, the pool is  
100 gradually depleted, sustaining increased synthesis sufficient to replenish the stores,

101 without requiring any feedback signal.

102 Their model (Fitzsimmons *et al.*, 1992) forms the basis for our work here.  
103 Focussed on testing different models of the mRNA pool and its relation to synthesis  
104 rate, they made the simplification that the synthesis rate always approaches a steady  
105 state equal to the rate of secretion. What limits this response and causes store  
106 depletion (and replenishment) in their model, is that this change in rate uses a long  
107 time constant, dependent on the half-life of mRNA, estimated by them at two days.  
108 They tested alternative models with activity dependent mRNA decay, and with longer  
109 and shorter fixed decay rates, but the best fit to the experimentally observed dynamics  
110 was with this model. The model was fitted to data from several sources (Young and  
111 Van Dyke, 1968; Jones and Pickering, 1969; Zingg, Lefebvre and Almazan, 1986;  
112 Roberts *et al.*, 1991) measuring the changing vasopressin content during a prolonged  
113 osmotic challenge (water deprivation or salt loading through high Na<sup>+</sup> drinking  
114 water), and the following recovery. It was also based on data estimating the rate of  
115 synthesis by measuring the accumulated vasopressin content at the cell bodies with  
116 transport blocked to the peripheral stores (Roberts *et al.*, 1991). Synthesis rates were  
117 estimated to be ~1-3 ng/h at basal, and 10 ng/h under hyper-osmotic conditions (3  
118 days of salt loading). They also showed that the synthesis rates only gradually return  
119 toward basal levels in the days following the osmotic challenge and that the transport  
120 rates (from cell body to peripheral stores) up- and down-regulate in parallel (Roberts  
121 *et al.*, 1991). This prolonged upregulation of synthesis and transport acts to replenish  
122 the peripheral stores.

123 The Pittsburgh model, which only simulates synthesis and the store, using the  
124 simplification that synthesis always tracks secretion, does not deal with the pathway  
125 between osmotic stimulus and regulation of mRNA. A representation of this pathway  
126 is required for our model, which takes as input a synaptic signal that encodes osmotic  
127 pressure. It is well established that osmotic stimulation increases vasopressin mRNA  
128 content (Sherman, McKelvy and Watson, 1986), and also known that hypo-osmotic  
129 conditions reduce mRNA content (Svane *et al.*, 1995). As well as increasing  
130 transcription rates, prolonged osmotic stimulation increases the length of the mRNA  
131 poly(A) tails (Carrazana, Pasiaka and Majzoub, 1988; Zingg, Lefebvre and Almazan,  
132 1988), and the overall changes in content are likely due to a combination. Longer  
133 poly(A) tails are thought to either increase mRNA stability or increase translation  
134 efficiency (Emanuel *et al.*, 1998). The functional effect of either would be to increase

135 the amount of synthesis per unit of mRNA.

136 The pathway between osmotic stimulus and transcription is still uncertain. The  
137 major candidate is a pathway via cyclic AMP (Carter and Murphy, 1989; Sladek *et*  
138 *al.*, 1996; Wong *et al.*, 2003) that acts to drive the CREB3L1 transcription promoter  
139 (Greenwood *et al.*, 2015). There is also evidence for a glutamate-NMDA receptor-  
140 Ca<sup>2+</sup> entry driven pathway (Lake, Corrêa and Müller, 2019). Here we are using a very  
141 simple representation to predict the necessary dynamics rather than any detailed  
142 modelling of the mechanisms.

143 Our objective here was to integrate, adapt and extend the Pittsburgh model  
144 into our existing integrated spiking and secretion model in order to fully simulate the  
145 pathway from osmotic signal to plasma hormone signal. The challenge we identified  
146 when testing the secretion model (MacGregor and Leng, 2013) is that heterogeneity,  
147 which brings essential benefits to producing a robust signal response, results in widely  
148 varying rates of secretion and store depletion across the population. The synthesis  
149 mechanism must be able to cope with varied demand not only as a population but also  
150 between individual neurons.

151 The new synthesis modelling has been kept as simple and general as possible,  
152 and should be capable of being adapted to other neuroendocrine cells, but is still able  
153 to produce strong quantitative as well as qualitative matches to the experimental data  
154 on synthesis rates, mRNA content, and depletion and repletion of vasopressin stores  
155 during prolonged osmotic challenge and recovery. However, in designing and fitting  
156 to match experimental data that shows a cycle of depletion and recovery during and  
157 after an osmotic challenge, the synthesis model is essentially constrained to fail at the  
158 task of matching supply to demand. By attempting to fix this in the model we explore  
159 why the stores get depleted; what are the limiting mechanisms, and why these limits  
160 might be necessary.

161

162

## 163 Results

164

### 165 Osmotic Challenge and Recovery Data

166 To set targets for fitting and testing the model, an extensive literature survey  
167 was used to gather multiple types of physiological data recorded in rats during a

168 prolonged osmotic challenge and the following recovery. This extends the examples  
169 of (Fitzsimmons *et al.*, 1992) where they compared multiple sources measuring the  
170 depletion and recovery of pituitary vasopressin stores. The data used here (Figure 1)  
171 includes osmolarity, plasma Na concentration, plasma vasopressin concentration,  
172 hypothalamic vasopressin mRNA content, and pituitary vasopressin content, during  
173 depletion and recovery. The data was extracted and reconstructed mostly by using  
174 graphics software (Adobe Illustrator) to measure points plotted in figures. A full list  
175 of the sources and tables of the data are given in the supplementary material.

176         The comparisons between multiple sources are imperfect. Experiments use  
177 different breeds and ages of rat, different timings of measurements (which are likely  
178 to have circadian sensitivity), and different assay techniques. In particular plasma Na  
179 is measured both by flame photometry and by electrode based techniques.  
180 Measurements of plasma vasopressin by radioimmunoassay are dependent on varying  
181 sample extraction techniques and assay antibodies. Using multiple sources has  
182 attempted to provide as clear a consensus as can be achieved, providing data to fit and  
183 test the input osmotic stimulus (osmolarity and plasma Na), the internal mRNA  
184 content, and the output plasma vasopressin and pituitary content.

185         The osmotic stimulus protocols vary between using dehydration (water  
186 deprivation) and salt loading (high Na drinking water) to raise osmolarity. In all the  
187 measurements except for plasma vasopressin these two protocols appear to produce an  
188 equivalent response (Figure 1). The lower plasma vasopressin concentrations  
189 observed under salt loading (~4 pg/ml vs 15 pg/ml under dehydration) are inconsistent  
190 with the similar rates of pituitary content depletion. Content depletion is likely to be a  
191 more robust measure of sustained vasopressin secretion rates, and so the model here  
192 targets the higher and more consistent plasma vasopressin concentrations observed  
193 under dehydration.

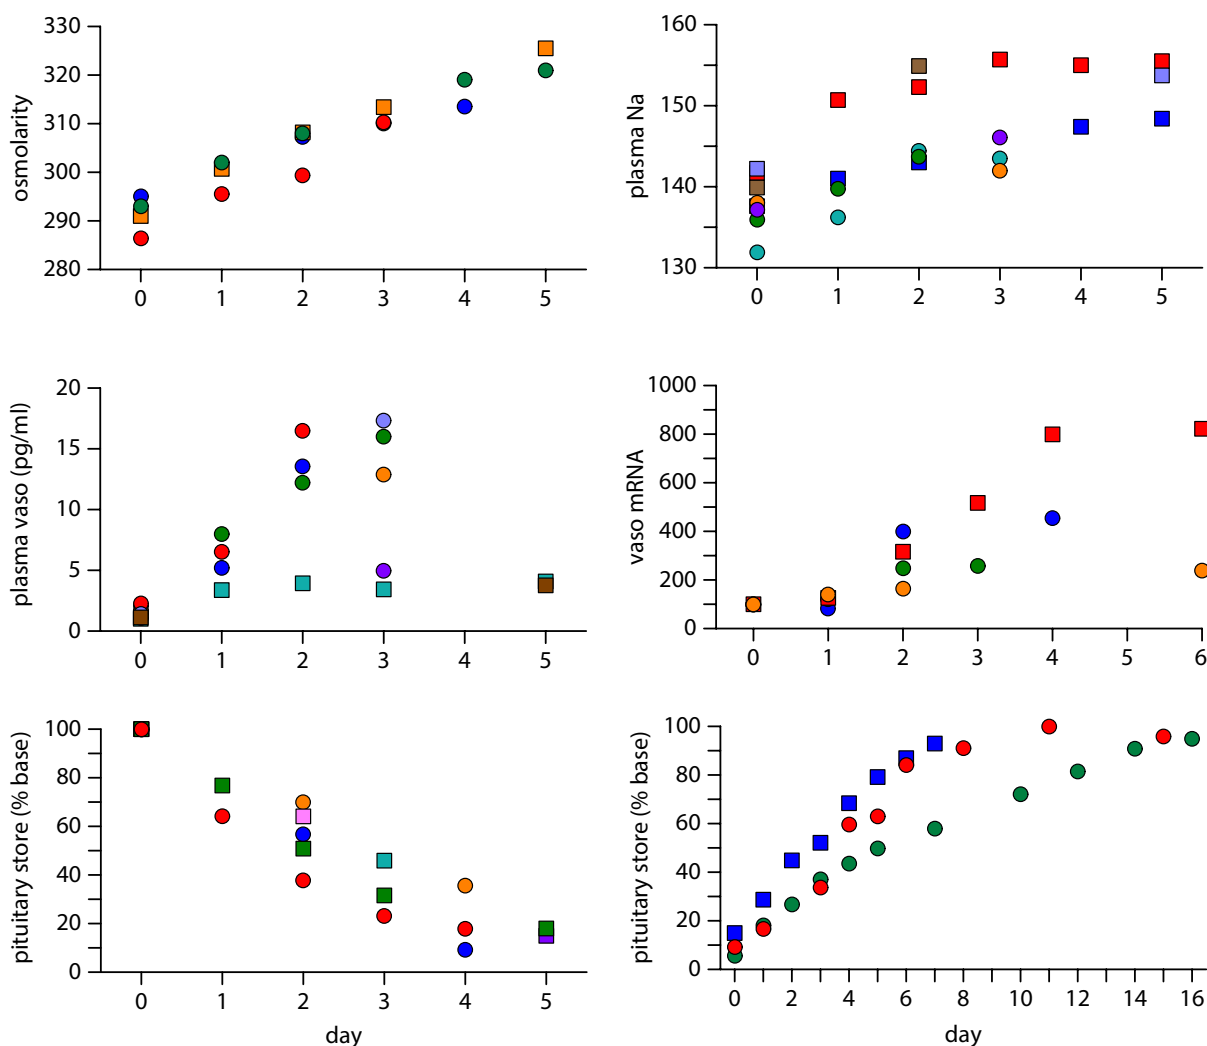

194

195 **Figure 1. Experimental data gathered during prolonged osmotic challenge and recovery**

196 The data here is gathered from multiple published sources where rats have been measured  
 197 during a prolonged osmotic challenge consisting of several days of dehydration or salt loading  
 198 (high sodium drinking water), and the following recovery period, with normal water access  
 199 restored. During the challenge osmolarity and plasma Na (top panels) rise mostly linearly, with  
 200 some data showing a reduced rate of rise and plateau towards day 4 and 5. Radioimmunoassay  
 201 measured plasma vasopressin concentration (mid left) mostly shows a matching linear rise, but  
 202 data is mostly limited to three days, and varies in magnitude between dehydration (higher) and  
 203 salt loading (lower) protocols. Vasopressin cell body mRNA content (mid right) shows a mostly  
 204 linear rise after one day that eventually plateaus. The data is variable, but the most consistent  
 205 experiments, with more time points, suggest a five to eight fold rise in content. The core target  
 206 data for the model is the measurements of pituitary store content (bottom). During the challenge  
 207 there is a mostly linear fall in pituitary content, which slows after day 3, falling to around 15 to  
 208 30% of normal content. During recovery, where osmolarity rapidly (a few hours) returns to  
 209 normal, the stores are slowly replenished over about two weeks. The faster recovery shown  
 210 here (blue squares) is in rats made hypo-osmotic after the prolonged hyper-osmotic challenge.  
 211 Detail on the sources is given in supplementary Figure S1.

212

213

## 214 The Spiking and Secretion Models

215 The spiking model used to generate the results here uses parameters (Table 1)  
216 chosen to simulate a typical magnocellular vasopressin neuron, based on detailed fits  
217 to *in vivo* recordings (MacGregor and Leng, 2012). As the synaptic input rate is  
218 increased, spiking shifts from silence to irregular spiking, phasic patterned spiking  
219 (long bursts and silences), increasing burst durations, and eventually continuous  
220 spiking. Figure 2 shows phasic spiking in the model. The non-linear stimulus-  
221 response properties of the secretory terminals (frequency facilitation and fatigue),  
222 simulated by the secretion model, are such that the phasic pattern is optimal in terms  
223 of secretion per spike. Thus the increase in the rate of secretion slows as the neuron is  
224 driven into less optimal continuous spiking.

225

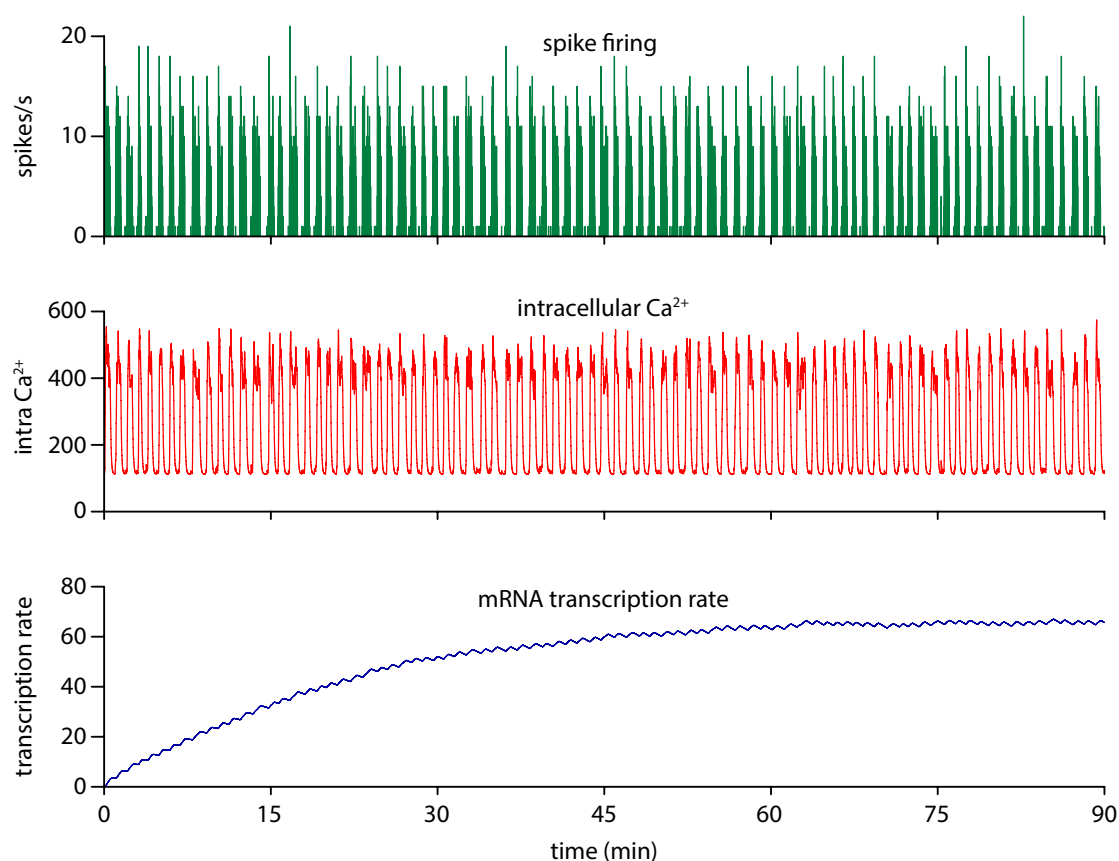

226

### 227 **Figure 2. Spike activity dependent regulation of transcription**

228 Phasic spiking in a highly stimulated integrate-and-fire based model neuron is both driven by  
229 and generates Ca<sup>2+</sup> entry, producing an intracellular Ca<sup>2+</sup> signal that is used to drive the model's  
230 vasopressin mRNA transcription rate. The essential dynamic is that the mechanism translates  
231 the rapidly changing and noisy electrical activity into a sustained slow-changing measure of  
232 activity.



233 The secretion model is modified from the previously published version as  
234 described in the Methods. It is coupled to a model of plasma diffusion and clearance  
235 which we previously developed to simulate oxytocin plasma concentrations (Maicas-  
236 Royo, Leng and MacGregor, 2018), with parameters adjusted using experimental data  
237 on vasopressin plasma concentrations and clearance rates, again as described in the  
238 Methods.

239

### 240 **Synthesis Model Basic Function and Tuning**

241 The synthesis model was initially tested using a single neuron. The secretion  
242 rate is scaled to the number of neurons to maintain comparable secretion and plasma  
243 concentrations independent of population size.

244 The transcription rate ( $T$ ) half-life  $\lambda_T = 1000$  s and upregulation rate  $k_T = 0.33$   
245 were chosen to produce a plausible timescale transcription rate signal, taking with  
246 input rate  $I_{re} = 380$  Hz,  $\sim 1$  h to reach equilibrium  $T = \sim 60$  (arbitrary units) from an  
247 initial  $T = 0$  (Figure 2). This signal forms a long timescale measure of spike activity  
248 which in turn drives the increase in mRNA content.

249 Figure 3 illustrates the basic function of the model with steady input rate  $I_{re} =$   
250 380 Hz, corresponding to a sustained hyperosmotic state. Vasopressin mRNA content  
251 rises very slowly towards an equilibrium at a rate and level determined by the balance  
252 between the transcription rate and depletion due to translation and synthesis. The rate  
253 of synthesis is directly proportional to the mRNA content ( $m$ ). The secretion rate and  
254 plasma concentration driven by the single phasic neuron are noisy but sustain steady  
255 levels until the reserve store is depleted. The releasable pool (which is refilled from  
256 the reserve) buffers the secretion response to maintain a steady rate until the reserve  
257 store is very heavily depleted. With no synthesis, the store fully depletes and plasma  
258 concentration falls to zero. With synthesis, the rate is insufficient to match the highly  
259 stimulated secretion rate and the store is still depleted, though at a slower rate. When  
260 it is depleted, secretion and plasma concentration is sustained, at a level purely  
261 dependent on the upregulated synthesis rate. We would not expect to observe this in  
262 the heterogeneous population *in vivo*, but this is what we would predict in a  
263 homogeneous population, assuming a sustained osmotic stimulus.

264

265

266

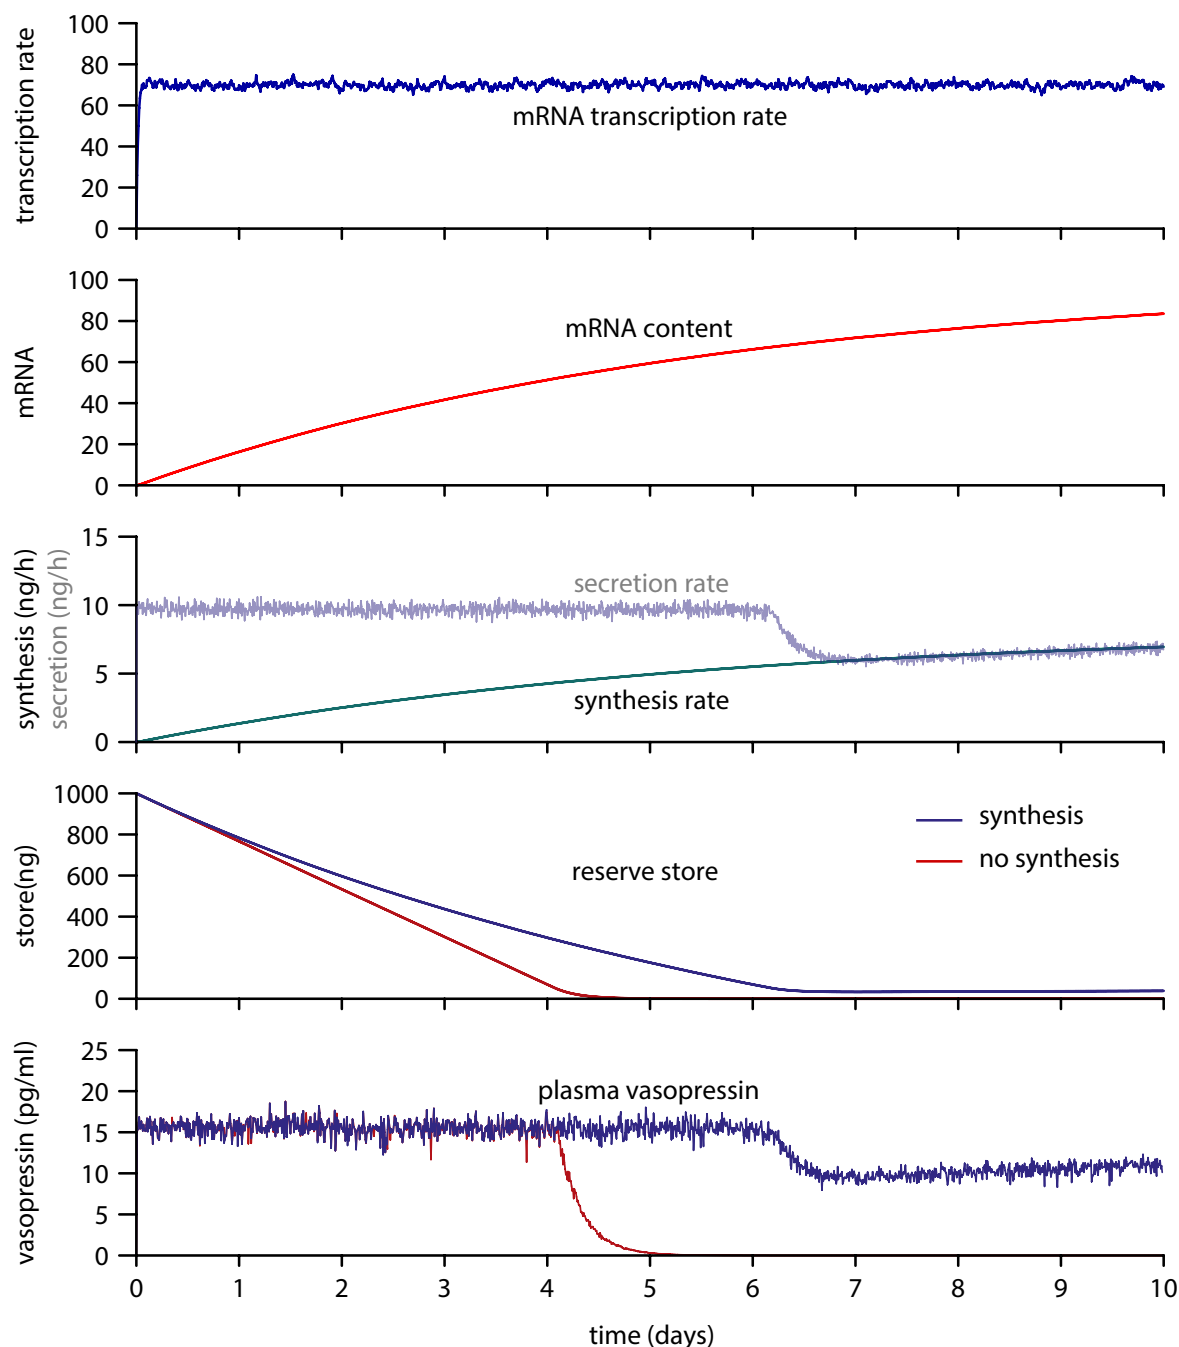

267

268 **Figure 3. Single neuron transcription-dependent regulation of mRNA content and**  
269 **synthesis rates.**

270 For illustration, rather than physiological simulation, the model here is initialised with a full  
271 store and zero stimulus, switching at time 0 to a sustained highly osmotic input signal.  
272 Transcription drives the accumulation of mRNA content, which in turn determines the rate of  
273 synthesis which maintains (or slows the depletion of) hormone stores. In the rapid change to a  
274 highly stimulated state here, elevated synthesis is not sufficient to match the rate of secretion,  
275 and stores are gradually depleted. When the stores are depleted the rate of secretion becomes  
276 purely synthesis rate dependent.

277

278 The secretion model parameters were fixed by fitting the secretion model to *in vitro*

279 data as described in the Methods and detailed in (MacGregor and Leng, 2013;  
280 Maícas-Royo, Leng and MacGregor, 2018). Coupled to the plasma model, this allows  
281 the prediction of the rates of secretion that correspond to plasma concentrations  
282 observed *in vivo*. In basal normo-osmotic conditions rat plasma vasopressin *in vivo* is  
283  $\sim 1$  pg/ml. In highly stimulated hyper-osmotic conditions plasma vasopressin *in vivo*  
284 rises to around 20 pg/ml. The left panels of Figure 4 show the single neuron model  
285 sustaining a mean 1 pg/ml plasma concentration with input rate  $I_{re} = 252$  Hz. The  
286 initial value for mRNA content ( $m = 15$ ), was set using an initial test to find its stable  
287 value at this input rate. The first target for tuning the synthesis model parameters was  
288 for synthesis to match secretion in basal conditions, in order to sustain a stable reserve  
289 store. The reserve store plot shows this achieved by reducing the synthesis rate ( $s_r =$   
290  $0.65$ ) compared to the final heterogeneous model parameter ( $s_r = 1.1$ ), which produces  
291 a small rise in the store, with synthesis exceeding secretion.

292

### 293 **Simulating Sustained Osmotic Challenge and Recovery**

294 The second target for tuning the model was to match the experimental data  
295 measuring vasopressin store content in rats during a five day osmotic challenge (no  
296 water access, or salt loading using high  $\text{Na}^+$  drinking water) and the following  
297 recovery (Figure 1). Experiments measuring osmolarity (or equivalent plasma  $\text{Na}^+$ )  
298 and plasma vasopressin during similar protocols (Walters and Hatton, 1974;  
299 Nordmann, 1985; Yue *et al.*, 2008) suggest that the osmotic stimulus rises mostly  
300 linearly during the challenge for at least the first three days before levelling off at  
301 sustained high levels, and rapidly recovering after the challenge period. We simplified  
302 this by using a linear ramp in the input rate to simulate the prolonged osmotic  
303 challenge, illustrated in the right hand panels of Figure 4. The initial input rate 252 Hz  
304 was ramped to 640 Hz over 5 days and then returned to 252 Hz, targeted to match the  
305 store depletion observed in the experimental data.

306 The transcription rate mostly tracks the osmotic stimulus. The stores decline in  
307 content to  $\sim 25\%$  before slowly recovering following the challenge, matching the  
308 experimental data and the results with the original Pittsburgh synthesis model. The  
309 mRNA content shows a more non-linear increase, and decline during the recovery  
310 period, as it sustains elevated synthesis rates to replenish the stores. However, the  
311 reduced synthesis rate ( $s_r = 0.65$ ) used to match secretion at basal levels (Figure 4 left)

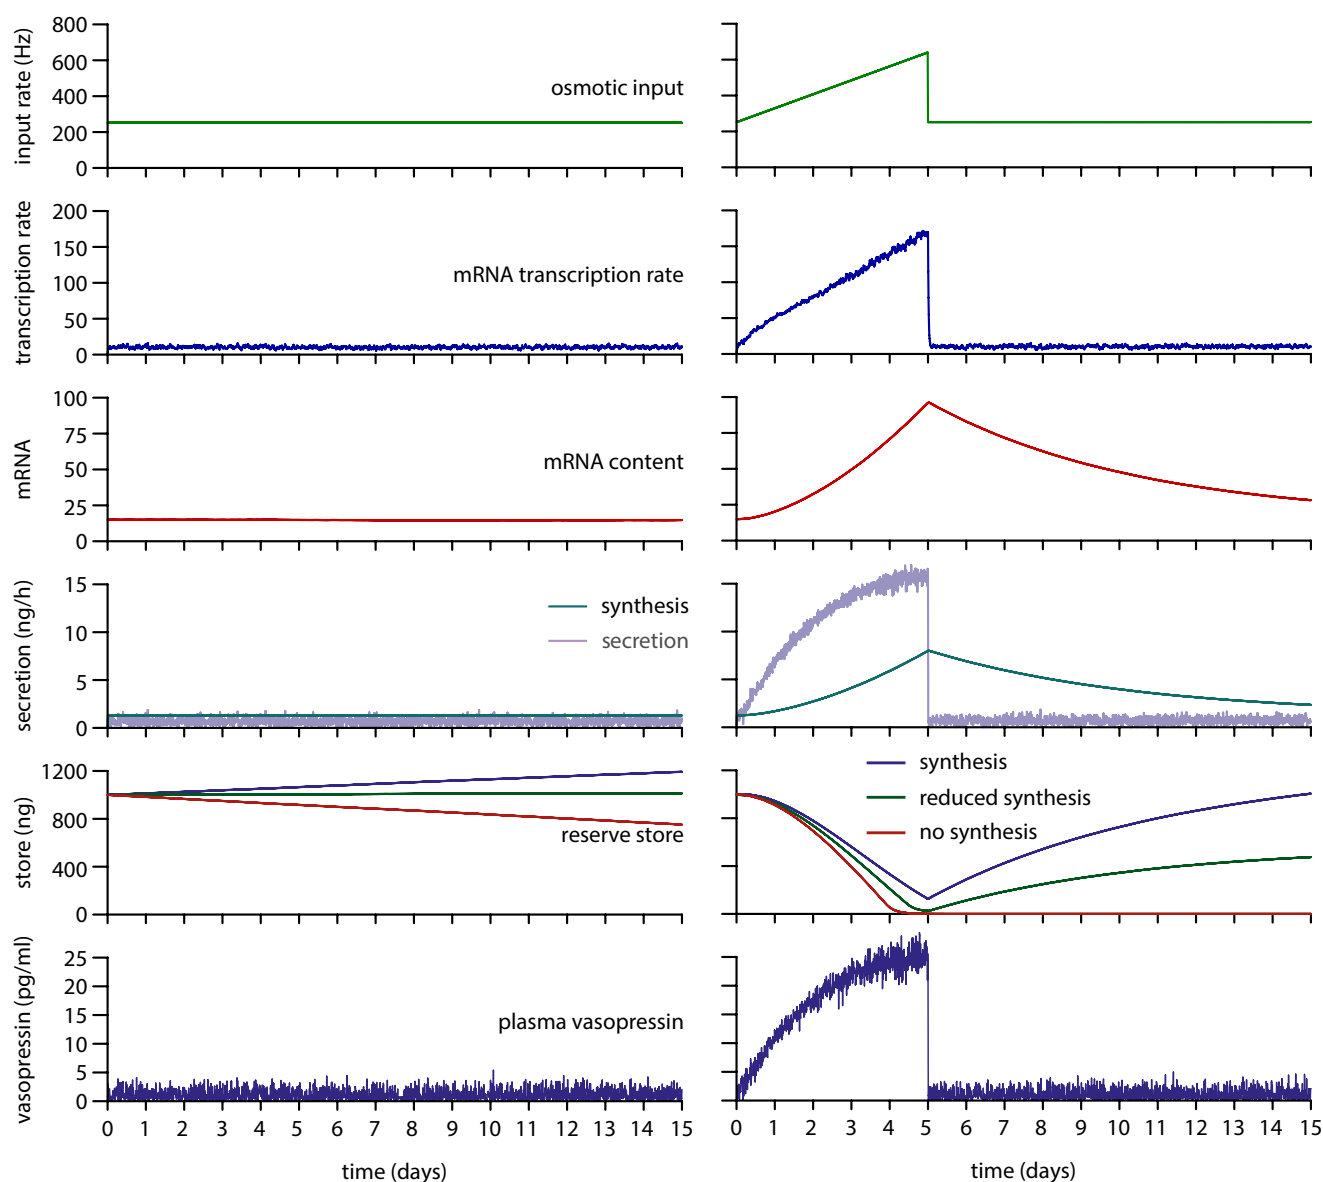

312

313 **Figure 4. Single neuron basal activity and prolonged osmotic challenge and recovery**

314 The plots on the left show basal activity sustaining a mean 1pg/ml plasma vasopressin. The  
 315 transcription rate rapidly rises to sustain mRNA content at 15 units. With default synthesis  
 316 rate scaling  $s_r = 1.1$ , the synthesis rate slightly exceeds the secretion rate and the reserve store  
 317 increases (blue). Setting  $s_r = 0.65$  (green) maintains a stable store. Removing synthesis by  
 318 setting  $s_r = 0$  shows a depleting store. The plots on the right show a 5 day osmotic challenge  
 319 (a linear ramp from basal, simulating progressive dehydration or salt loading) followed by 10  
 320 day recovery (input returned to basal). The transcription rate mostly tracks the osmotic  
 321 stimulus with some drop off due to non-linearities in the spiking response. The mRNA  
 322 content rises non-linearly as the balance shifts between transcription, and depletion due to  
 323 synthesis (translation). The synthesis rate increases but fails to track the increasing secretion  
 324 rate. The reserve store is gradually depleted to  $\sim 27\%$ . Plasma vasopressin increases initially  
 325 linearly but then slows as the neurons shift from phasic to continuous spiking. Following the  
 326 ramped challenge, secretion falls to basal rates, but elevated synthesis is sustained by the  
 327 increased mRNA content, depleting this to recharge the reserve store.

328

329 produces more depletion of the stores and an incomplete recovery. As shown below,  
330 the synthesis model was more difficult to tune for a homogeneous than a  
331 heterogeneous population.

332

### 333 **Synthesis Response in a Heterogeneous Population**

334 Osmotically stimulated vasopressin neurons recorded *in vivo* show widely  
335 varying spiking rates. We can simulate this heterogeneity by randomly varying the  
336 amount of synaptic input received by each model neuron, applying a varied input  
337 density parameter, as detailed in the Methods. This heterogeneity has a substantial  
338 functional advantage, producing a much more linear plasma vasopressin response to a  
339 changing osmotic input signal than a homogeneous population (MacGregor and Leng,  
340 2013). This matches the response that has been observed experimentally, however it  
341 results in also producing highly heterogeneous secretion rates and store depletion  
342 across the population. Here we tested how the synthesis model would respond to these  
343 varied stimulus and store depletion rates, and how this would affect the summed  
344 population response. The model was set up to record both the summed population and  
345 the individual neuron mRNA content, reserve store, and secretion rates.

346 A 100 neuron heterogeneous population was randomly generated with a  
347 lognormal distribution, illustrated in the inset of Figure 5. The basal population input  
348 rate (which is modified by each neuron's input density) was set to 207 Hz to produce  
349 a sustained 1 pg/ml plasma vasopressin concentration. The initial values for  $m$  were  
350 set for each neuron by running the model with a 207 Hz population input until the  
351 neurons'  $m$  values had stabilised, starting with common values of  $m = 10$ . No other  
352 parameter adjustment was required from the same basal protocol tested with the  
353 homogeneous model (Figure 4). This produced both a stable plasma vasopressin  
354 signal and a stable summed reserve store. As well as the summed population data  
355 Figure 5 shows a sample of three neurons from the low, middle, and high end of the  
356 activity distribution. The low and middle neurons (blue and green) both had very low  
357 spiking and secretion rates. Their mRNA content  $m$  was down-regulated to almost  
358 zero, with a matching low synthesis rate. This matches what is observed  
359 experimentally in hypo-osmotic conditions, showing the ability to down-regulate as  
360 well as upregulate from the basal synthesis activity. The high activity neurons  
361 (example here in red) show an increased mRNA content and a sustained secretion rate  
362 much higher than the population mean. They also show a gradual increase of their

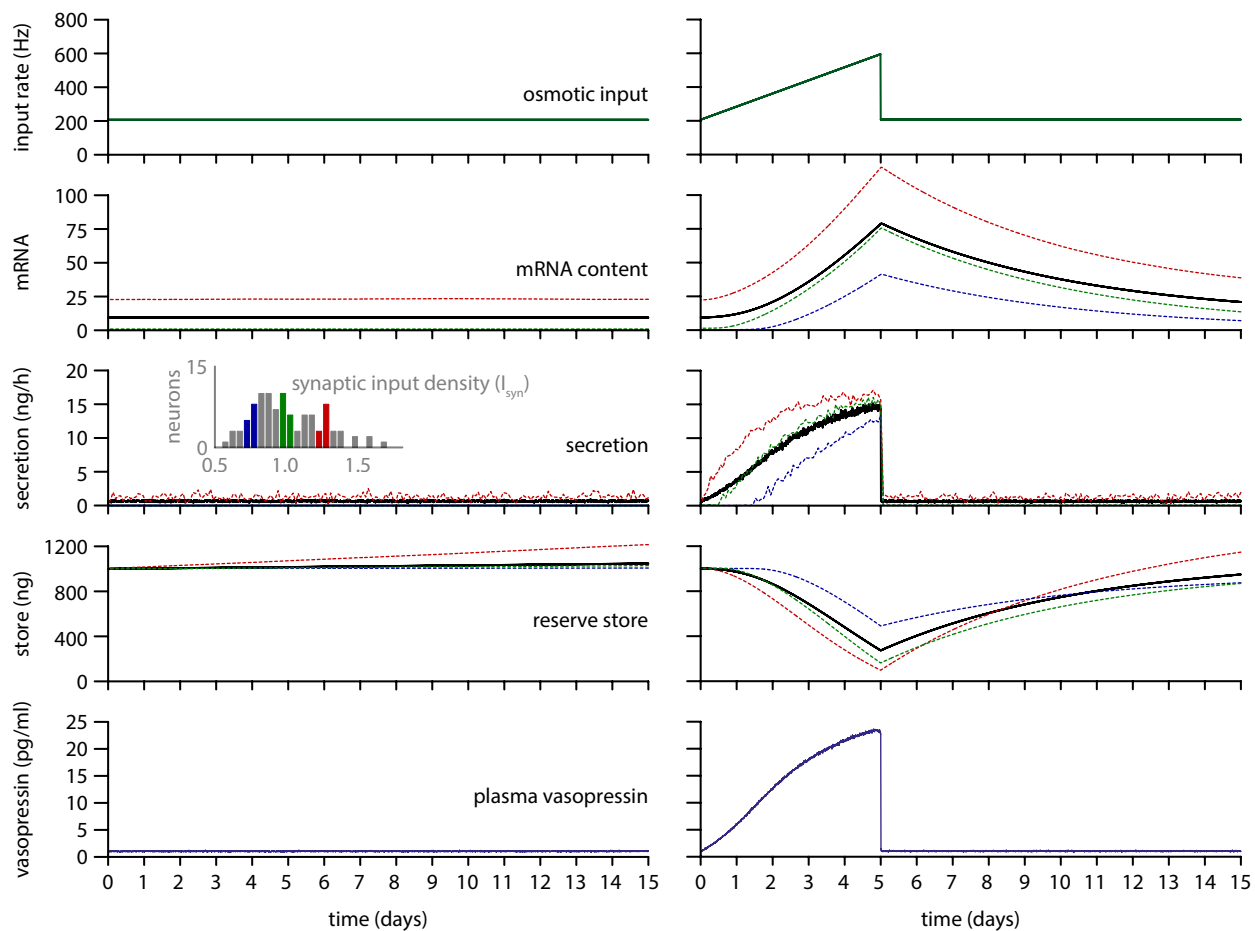

363

364 **Figure 5. Basal activity and prolonged challenge and recovery in a heterogeneous**  
 365 **population**

366 The data here show a 100 neuron heterogeneous population following the same protocols as  
 367 Figure 4. The inset distribution shows the heterogeneous input rates and the colour coded  
 368 example neurons. In the left hand plots, with default synthesis scaling  $s_r = 1.1$ , the  
 369 heterogeneous population sustains a stable reserve store at basal activity (1 pg/ml plasma  
 370 vasopressin). The majority of the secretion is from the more active neurons (red) and these show  
 371 gradual increase of individual neuron stores. In the right hand plots, the challenge and recovery  
 372 protocol shows similar results to the single neuron (Figure 4), but with a more stable and linear  
 373 plasma signal. The individual neurons show some complex divergence in their store recovery,  
 374 due to varied non-linearities in secretion and synthesis. The more active cells, even with highly  
 375 elevated mRNA, show more rapid depletion, but also a more rapid, and even excess recovery.  
 376

377 stores as synthesis exceeds the secretion rate.

378 Testing the ramped challenge and recovery protocol (initial population input  
 379 rate 207 Hz ramped to 595 Hz over 5 days then returned to 207 Hz), plasma  
 380 vasopressin and the summed population data shows very similar results to the  
 381 homogeneous population. In this highly stimulated protocol the middle activity  
 382 neuron more closely matches the mean population rates. The secretion rates of

383 individual neurons are much more non-linear than the population mean, and the  
384 plasma concentration shows a more linear response to the ramped stimulus than the  
385 homogeneous population.  
386

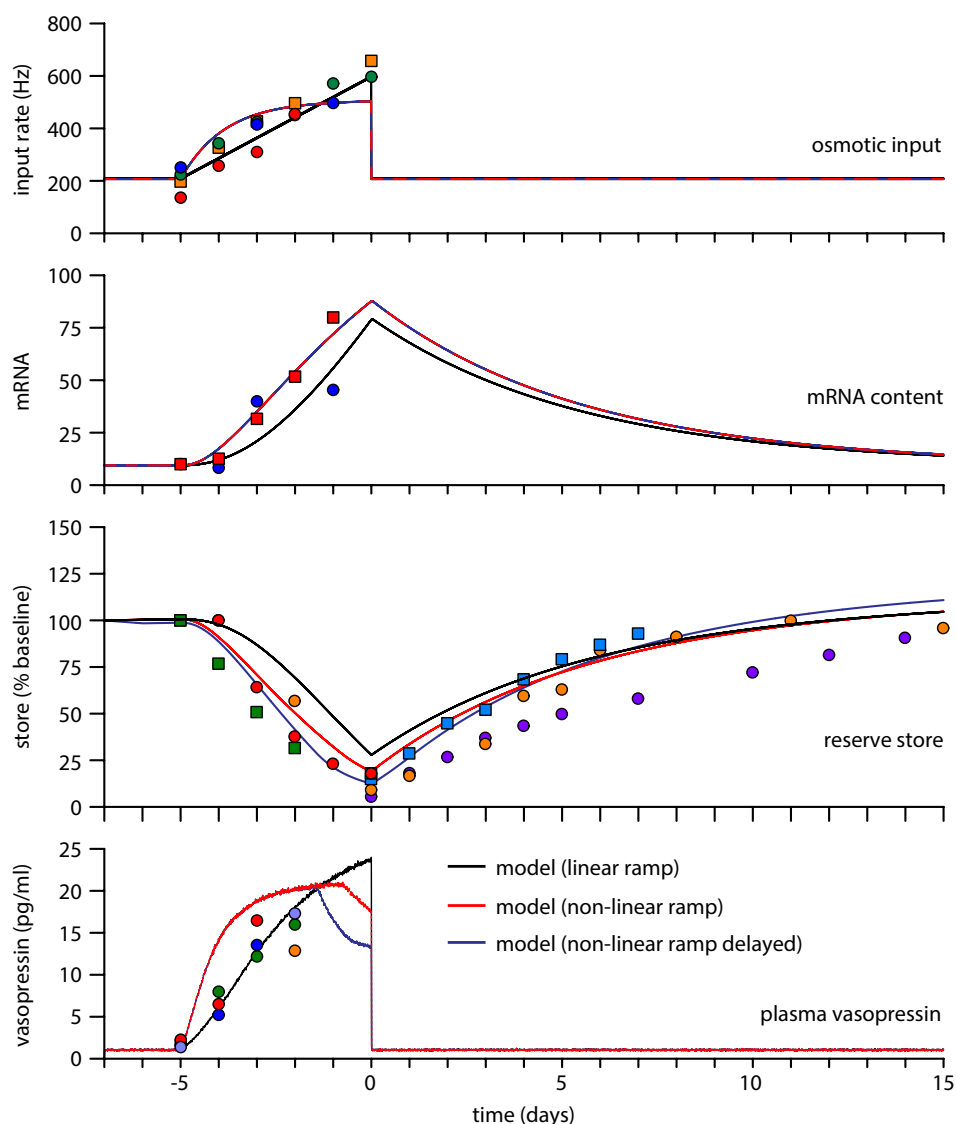

387

388 **Figure 6. Model challenge and recovery compared to experimental data**

389 The 100 neuron heterogeneous population here simulates 2 days of basal activity, followed by  
390 5 days of dehydration, and 15 days of recovery, compared against experimental data from  
391 Figure 1. Two input signal protocols are compared, a default linear ramp (black) and a non-  
392 linear ramp (red) with a more rapid initial increase in osmotic signal. Within the variability of  
393 the experimental data both ramps are potentially consistent. The linear ramp varies from the  
394 store data in its slower initial decline in content, more closely matched by the non-linear ramp,  
395 which produces a faster increase in secretion than synthesis, resulting in more rapid initial store  
396 depletion. The model was further tested with an added delay between synthesis and store fill  
397 rate (blue), simulating the estimated 24h transport delay. The delay only moderately changes  
398 the population store depletion and recovery profile, however more active neurons become fully  
399 depleted, resulting in a drop off in the plasma signal.

## 400 **Model Compared to Experimental Data**

401 Figure 6 uses the same heterogeneous population model as Figure 5, with an  
402 extended time protocol for comparison with the experimental data, 2 days of basal  
403 activity followed by a 5 day osmotic challenge and 15 days of recovery. The results  
404 show a population store that falls to ~ 25 % during the 5 day challenge and  
405 replenishes to almost full over the 15 day recovery period, very similar to the  
406 experimental data in rats. A notable difference however is that the model's store using  
407 the linear ramp (black) protocol shows a slower initial decline. The match was  
408 improved by using a more non-linear ramp (red) in the osmotic input signal,  
409 producing a more rapid initial increase that gradually slows. Experimental evidence  
410 for the ramp in osmotic input and plasma vasopressin is variable and limited by  
411 temporally sparse measurements but suggests something that lies between these two.  
412 The model was further modified (blue) by adding a 24 h delay between the synthesis  
413 rate and the store fill rate representing the slow transport of new vesicles from the cell  
414 body to the pituitary stores, thought to take up to 24 h depending on osmotic status  
415 (Russell, Brownstein and Gainer, 1981). The delay more closely matches the  
416 depletion observed experimentally, but its effect is modulatory, and not sufficient to  
417 explain store depletion alone.

418

## 419 **What Limits the Synthesis Response?**

420 The current model matches the limited upregulation of synthesis, and  
421 depletion of stores, observed in the experimental data. Changes to the model,  
422 attempting to improve this response, were tested to predict which mechanisms might  
423 be responsible for this limited ability to match secretion demand (Figure 7). Two  
424 methods were found which were able to produce a much faster upregulation of  
425 synthesis while maintaining the ability to function in basal and stimulated states  
426 without under- or over-filling the stores. The first method (red in Figure 7) accelerates  
427 the upregulation of transcription. This required three parameter changes, increasing  
428 the rate of transcription but also compensating the increased amount so that only the  
429 speed of the response was changed ( $k_T$  0.33 to 3.3,  $s_{basal}$  0.7 to 7,  $s_r$  1.1 to 0.11). The  
430 produces a much faster increase in the mRNA store and corresponding synthesis rate,  
431 resulting in a much smaller vasopressin store depletion. However it also predicts a  
432 much larger increase in mRNA than is observed experimentally (20-fold compared to  
433 ~5 to 8-fold). The second method (blue in Figure 7) increases the rate of translation



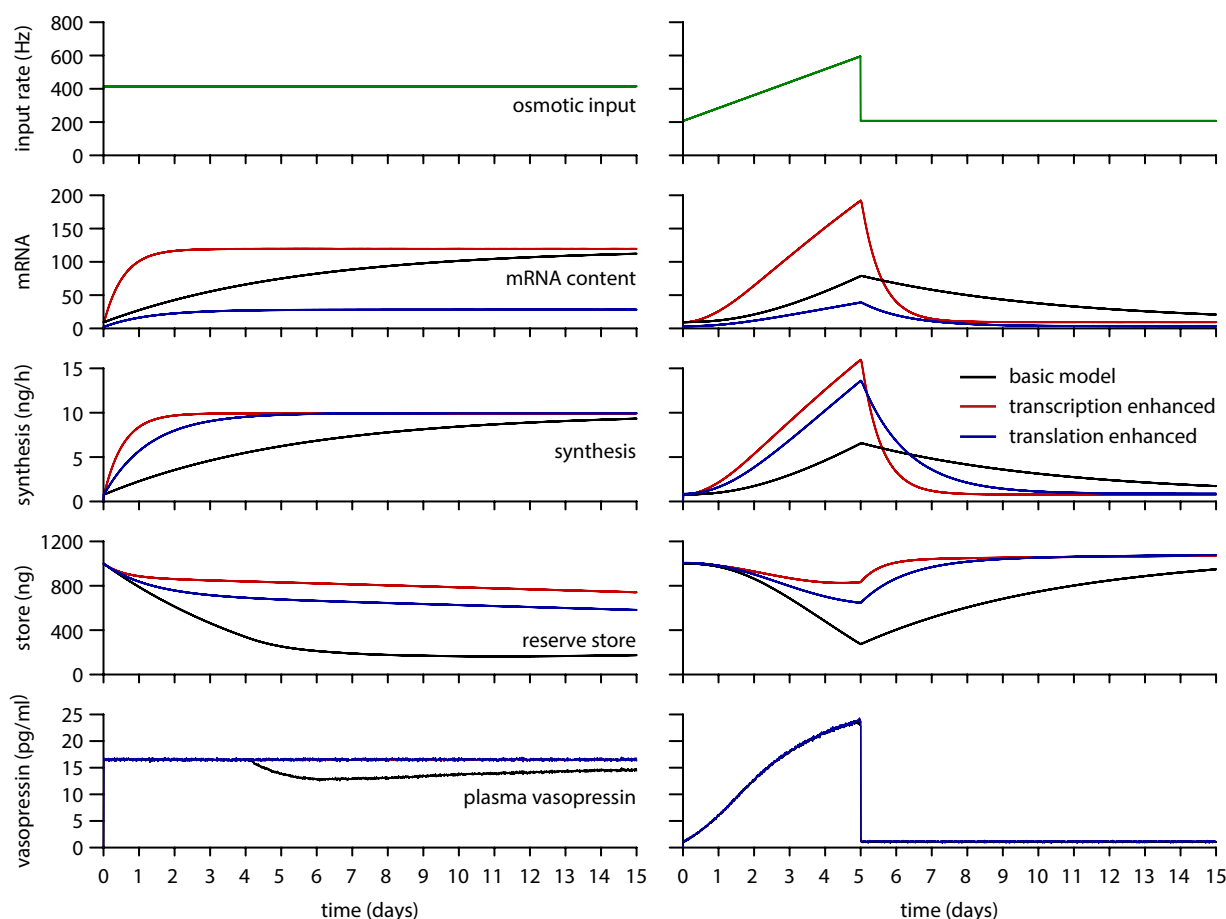

434

435 **Figure 7. Improving synthesis performance by enhancing transcription or translation**

436 Two enhancements are compared to the basic (black) experimental data fitted model (Figure 5  
 437 and 6), attempting to predict what limits the synthesis response *in vivo*. Accelerating  
 438 transcription (red) produces a much faster upregulation of mRNA content and synthesis rate,  
 439 reducing store depletion but depending on a larger mRNA capacity. Increasing the proportional  
 440 translation rate (blue) similarly produces a faster upregulation of synthesis, with a more rapid  
 441 depletion of mRNA content resulting in a lower equilibrium level. This reduces store depletion  
 442 but likely depends on a translation rate which is beyond the capability of the cells.

443

444 ( $S_{basal}$  0.7 to 3), increasing the rate of synthesis in exchange for a faster depletion of  
 445 the mRNA store. This similarly produces a faster upregulation and reduced  
 446 vasopressin store depletion but also results in a much smaller increase in the mRNA  
 447 store, since the mRNA equilibrium level is determined by the balance between  
 448 transcription and translation. Thus, the model predicts that the main elements  
 449 responsible for vasopressin store depletion are the lag in upregulation of mRNA, and  
 450 the maximum mRNA capacity, combined with a limit on the rate of translation. It  
 451 may be that cells are capable of exceeding these limits, but that it is not efficient to  
 452 maintain this capacity.

## 453 Discussion

454

455 This study is part of a project aimed at understanding how vasopressin  
456 neurons function as part of a physiological system on very long time scales. On the  
457 surface they appear to perform a very simple signal processing task, producing a  
458 plasma hormone signal that linearly encodes osmotic pressure. However, they have  
459 many complex features, in particular their distinctive phasic firing, its relationship  
460 with the highly non-linear properties of their secretory terminals, and their highly  
461 heterogeneous activity levels. The phasic firing is asynchronous and not reflected in  
462 the functional signal of their plasma summed secretory output. It appears that the  
463 complexity is not about computation, but about being robust, adaptable, and efficient,  
464 and maintaining function over lifelong periods of time. This relationship between  
465 complexity and function is likely to be true of many neuro-physiological systems, and  
466 the experimentally accessible and well-studied vasopressin neurons therefore serve as  
467 a very good model system.

468 Essential to understanding the long term function of neuroendocrine  
469 neurons (and other endocrine cells) is the dynamics of hormone storage and synthesis  
470 and the focus here has been building and testing a synthesis model to integrate with  
471 our existing spiking and secretion model. The new model is built on the work of  
472 Fitzsimmons et al (Fitzsimmons *et al.*, 1992) which showed that activity-dependent  
473 upregulation of mRNA content could best explain the experimentally observed  
474 dynamics of store depletion and recovery. The challenge here was to integrate and  
475 adapt the model to function without any direct tie between the rates of synthesis and  
476 secretion, and for it to function within individual neuron models as part of a  
477 heterogeneous population. This has been successful, providing further evidence that  
478 the accumulation of mRNA is key to synthesis dynamics. In normal and hypoosmotic  
479 conditions mRNA content functions to measure and service current demand. In  
480 hyperosmotic conditions it serves as a memory of sustained challenge and following  
481 the challenge provides a resource to recover depleted hormone stores.

482 The mechanisms of the robust new model components presented here are very  
483 simple. The key to this was the strongly quantitative properties of the secretion and  
484 plasma model. The existing vasopressin neuron model was also further developed  
485 here by integrating a new model of hormone diffusion and clearance in plasma, and

486 by refining the quantitative scaling of the existing secretion model, based on previous  
487 work in oxytocin neurons (Maicas-Royo, Leng and MacGregor, 2018). The  
488 importance of this was in relating rates of secretion to experimentally observed  
489 plasma concentrations, thereby accurately simulating hormone store depletion (and  
490 recovery) and constraining synthesis rate demands. Initial attempts at building the  
491 synthesis model, before the secretion rate scaling had been corrected, and the apparent  
492 synthesis rate demands were much higher, used an additional activity-dependent  
493 component for the translation rate, shown ghosted in Figure 8. This was not robust,  
494 being very sensitive to the balance between parameter values driving the activity  
495 dependent transcription and translation components. The version presented here uses  
496 only a fixed translation rate, proportional to the mRNA content. Thus, making the  
497 model more quantitatively accurate actually reduced the necessary complexity.

498 The model also uses a simple representation of the relationship between  
499 osmotic stimulus and transcription, making use of the spiking model's  $Ca^{2+}$  variable.  
500 Rather than the mechanism necessarily being  $Ca^{2+}$ -dependent, the necessary  
501 assumption here is that transcription closely tracks spike activity. This helps the  
502 model to maintain a tracking between the synthesis and secretion rates without any  
503 cross-communication. If transcription was more directly driven by synaptic input then  
504 the complexities of phasic firing would disrupt this tracking.

505 Where the model's behaviour becomes more complex is in the dynamics of  
506 stores in a heterogeneous population. Heterogeneous activity levels would be  
507 expected to present a big challenge to maintaining the tracking between synthesis and  
508 secretion rates and it was surprising how robust the heterogeneous population proved  
509 to be. This is partly because heterogeneity as well as adding complexity, also removes  
510 some by linearising the relationship between the input and output signals. However,  
511 there is some variation across the heterogenous population in how well stores are  
512 maintained, suggesting that a statically heterogeneous population will gradually  
513 diverge in store content. The simple model tested here puts no limits on the mRNA  
514 content or vasopressin stores in individual neurons. These limits are likely to exist in  
515 some form and would act to reduce the divergence between neurons, but it does  
516 nevertheless seem likely that a static heterogeneous population would struggle to  
517 maintain function over long periods. Thus the model here has developed a tool to  
518 further examine rather than solve the problem of store divergence identified in the  
519 previous work (MacGregor and Leng, 2013).

520           The alternative is dynamic or regulated heterogeneity. Here we refer to our  
521 neurons as a population, connected only at their functional input and output signals.  
522 However vasopressin neurons have the ability to communicate through dendritic  
523 release of various signals including vasopressin, and potentially act as a network.  
524 There is evidence that these signals act to modulate the activity of neighbouring  
525 neurons (Gouzènes *et al.*, 1998) and it has been proposed that the network might act  
526 to cycle activity levels (Scott and Brown, 2010), letting rested neurons replace those  
527 that have been more active and become depleted. Such a mechanism would also  
528 contribute to the lifetime robustness of the system by compensating for lost neurons.  
529 The question for this that arises from the work here is what measure would regulate  
530 the dendritic signals? For the same reasons that synthesis rates are not thought to be  
531 directly coupled to secretion (distant and distributed stores), it would be difficult to  
532 directly measure store depletion. Do the stores available for dendritic release deplete  
533 sufficiently in parallel to the peripheral stores? Could elements of the synthesis  
534 mechanism also regulate dendritic signalling?

535           One of the main limitations in interpreting the results here is the highly  
536 simplified simulation of the prolonged osmotic challenge. The linear ramp is based on  
537 experimental data measuring vasopressin concentrations, osmotic pressure, and/or  
538 plasma Na<sup>+</sup> which show mostly linear increases with time during an osmotic  
539 challenge over at least three days. After three days however, these increases tend to  
540 slow, probably as the high sustained vasopressin output, and regulation of other  
541 elements involved in osmotic homeostasis, such as salt excretion, achieve some sort  
542 of new equilibrium. There is also evidence of this in the data measuring store content,  
543 where the rate of depletion appears to fall towards the latter part of the challenge. We  
544 began addressing this here in the model using a non-linear input ramp, but a much  
545 better approach in terms of gaining understanding would be to integrate the neural  
546 population model into a simple system model of osmotic homeostasis, providing  
547 feedback between the vasopressin output and the osmotic input signal.

548           Another assumption here is the simple linear encoding between osmotic  
549 stimulus and the rate of synaptic input. Recent work in oxytocin neurons (Maícas  
550 Royo, Leng and MacGregor, 2019) modelling osmotic stimulus in more detail, to  
551 simulate experiments in which plasma oxytocin was measured in response to Na<sup>+</sup>  
552 injections or infusions, supports this. The linear encoding assumption was sufficient  
553 to closely match experimental plasma concentrations with the model, and it is

554 reasonable to assume similar in vasopressin neurons. The exceptions to this are likely  
555 to be in special conditions such as pregnancy.

556         The work here has modelled the activity-dependent hormone synthesis  
557 mechanisms of vasopressin neurons and integrated this into a model of spiking and  
558 secretion, further refined and developed to accurately simulate plasma vasopressin  
559 concentrations in response to dynamic osmotic stimuli. It has shown that the idea of  
560 synthesis driven by the regulation of mRNA content remains robust without any  
561 assumption of synthesis directly coupled to secretion, and within the complexities of  
562 population heterogeneity. The model provides a strong base for future work exploring  
563 the mechanisms that coordinate vasopressin neurons as a network to maintain function  
564 over lifelong periods of time, including investigation of the dysfunction of these  
565 systems.

566

567

## 568 Methods

569

### 570 **The Spiking Model**

571         Many vasopressin neurons when stimulated generate a distinctive phasic  
572 pattern of spiking, alternating between sustained bursts and silences lasting tens of  
573 seconds. This is modelled here using an integrate-and-fire based model (MacGregor  
574 and Leng, 2012) modified to include a set of activity-dependent potentials that  
575 modulate excitability to shape spike patterning and generate an emergent bistability,  
576 matching the observed phasic firing and detailed spike patterning measured using  
577 analysis such as the inter-spike interval (ISI) histogram and hazard function (Sabatier  
578 *et al.*, 2004). Importantly the model also matches the changes in the phasic spiking  
579 that occur in response to a changing input signal.

580         The excitability modulating potentials include a hyperpolarising afterpotential  
581 (HAP), a fast depolarising afterpotential (DAP), and a slow after hyperpolarisation  
582 (AHP). Each of these is modelled using a single variable that is step incremented with  
583 each spike and decays exponentially. This simple form has proven sufficient to  
584 produce close quantitative matches to experimentally measured spike patterning and  
585 is used here for the activity dependent elements of the model.

586         The phasic firing mechanism uses a slow DAP based on a  $\text{Ca}^{2+}$  inactivated

587 hyperpolarising  $K^+$  leak current  $V_L$  (i.e. an activity-dependent depolarisation generated  
 588 by switching off a hyperpolarisation). This is modulated by two opposing step-and-  
 589 decay variables representing spike generated  $Ca^{2+}$  entry, and dendritic dynorphin  
 590 release, which slowly accumulates to oppose the action of  $Ca^{2+}$  and reactivate the  $K^+$   
 591 leak current, eventually terminating a burst and sustaining the period of inter-burst  
 592 silence.

593 With more detail in (MacGregor and Leng, 2012; Maícas Royo *et al.*, 2016),  
 594 the spiking model is summarised by:

595

$$596 \quad V = V_{rest} + V_{syn} - HAP - AHP_{slow} + DAP - V_L$$

597

598 where  $V$  is the membrane potential,  $V_{rest}$  is the resting potential, and  $V_{syn}$  is the  
 599 summed synaptic input signal described below.  $AHP_{slow}$  is the renamed AHP of  
 600 (MacGregor and Leng, 2012) to distinguish it from the medium AHP of (Maícas  
 601 Royo *et al.*, 2016). The default parameters are given in Table 1.

602

603

604 Table 1: Spiking Model Parameters

605

| Name                   | Description                           | Value (units)   |
|------------------------|---------------------------------------|-----------------|
| $I_{re}$               | excitatory input rate                 | 230 (Hz)        |
| $I_{ratio}$            | inhibitory input ratio                | 0.75            |
| $e_h$                  | EPSP amplitude                        | 3 (mV)          |
| $i_h$                  | IPSP amplitude                        | -3 (mV)         |
| $\lambda_{syn}$        | PSP half life                         | 7.5 (ms)        |
| $k_{HAP}$              | HAP amplitude per spike               | 60 (mV)         |
| $\lambda_{HAP}$        | HAP half life                         | 9 (ms)          |
| $k_{DAP}$              | fast DAP amplitude per spike          | 1 (mV)          |
| $\lambda_{DAP}$        | fast DAP half life                    | 150 (ms)        |
| $k_{AHP_{slow}}$       | slow AHP activation factor            | 0.00012 (mV/nM) |
| $\lambda_{AHP_{slow}}$ | slow AHP half life                    | 10000 (ms)      |
| $C_{AHP_{slow}}$       | minimum $[Ca]_i$ to activate slow AHP | 200 (nM)        |
| $C_{rest}$             | rest $[Ca]_i$                         | 113 (nM)        |
| $k_C$                  | $[Ca]_i$ increase per spike           | 11 (nM)         |
| $\lambda_C$            | $[Ca]_i$ half life                    | 2500 (ms)       |
| $k_D$                  | dynorphin activation per spike        | 2.693           |
| $\lambda_D$            | dynorphin half life                   | 7500 (ms)       |
| $k_L$                  | $K^+$ leak calcium sensitivity        | 36 (nM)         |
| $g_L$                  | $K^+$ leak maximum voltage            | 8.5 (mV)        |
| $V_{rest}$             | resting potential                     | -62 (mV)        |
| $V_{thresh}$           | spike threshold potential             | -50 (mV)        |

606

607

## 608 **Synaptic Input Signal**

609         The osmotic stimulus is encoded by a mixed train of excitatory and inhibitory  
610 post-synaptic potentials (EPSPs and IPSPs). Mixed synaptic input contributes to  
611 producing a more linear spiking response to an increasing input signal (Leng *et al.*,  
612 2001; Maícas Royo *et al.*, 2016). This synaptic input signal  $V_{\text{syn}}$  is simulated using a  
613 Poisson random process to generate small (3 mV) exponentially decaying positive and  
614 negative perturbations to the membrane potential. The proportion of inhibitory to  
615 excitatory PSPs uses a fixed value of 0.75, reduced from the previous 1.0 ratio, based  
616 on more detailed modelling of magnocellular neurons (Leng, Leng and MacGregor,  
617 2017). The strength of the stimulus is represented by the mean EPSP rate  $I_{\text{re}}$ .

618

## 619 **Secretion and Plasma Model**

620         Good quantitative scaling is essential to understanding the qualitative  
621 properties of the neurons, and relating mechanism to function. A necessary element  
622 for understanding the synthesis mechanisms is to be able to relate the input signal and  
623 spiking activity to the output plasma concentration, in order to constrain the rates of  
624 secretion and synthesis. Plasma concentration is the most accessible measure of  
625 secretion in the experimental data. Our previous work developing the vasopressin  
626 secretion model used a simple, single volume estimate of the relation between  
627 secretion rate and plasma concentration (MacGregor and Leng, 2013). More recently  
628 we adapted the secretion model to oxytocin neurons and integrated a new model of  
629 plasma diffusion and clearance (Maícas-Royo, Leng and MacGregor, 2018) which is  
630 able to accurately predict experimental measurements of oxytocin plasma  
631 concentration in response to both an acute stimulus (CCK injection, (Maícas-Royo,  
632 Leng and MacGregor, 2018)) and slower osmotic challenges (Maícas Royo, Leng and  
633 MacGregor, 2019).

634         The plasma model's volume, clearance, and diffusion rate parameters were  
635 fitted using experimental data testing exogenous infusions of oxytocin (Ginsburg and  
636 Smith, 1959; Fabian *et al.*, 1969). It models peripherally secreted oxytocin as  
637 distributed between plasma and extravascular fluid (EVF) compartments, with  
638 roughly similar volumes (8.5 ml and 9.75 ml respectively for a 250g rat), diffusing  
639 between the two according to the concentration gradient with a time constant  
640 estimated by the experimental data. Clearance is a single component from the plasma,

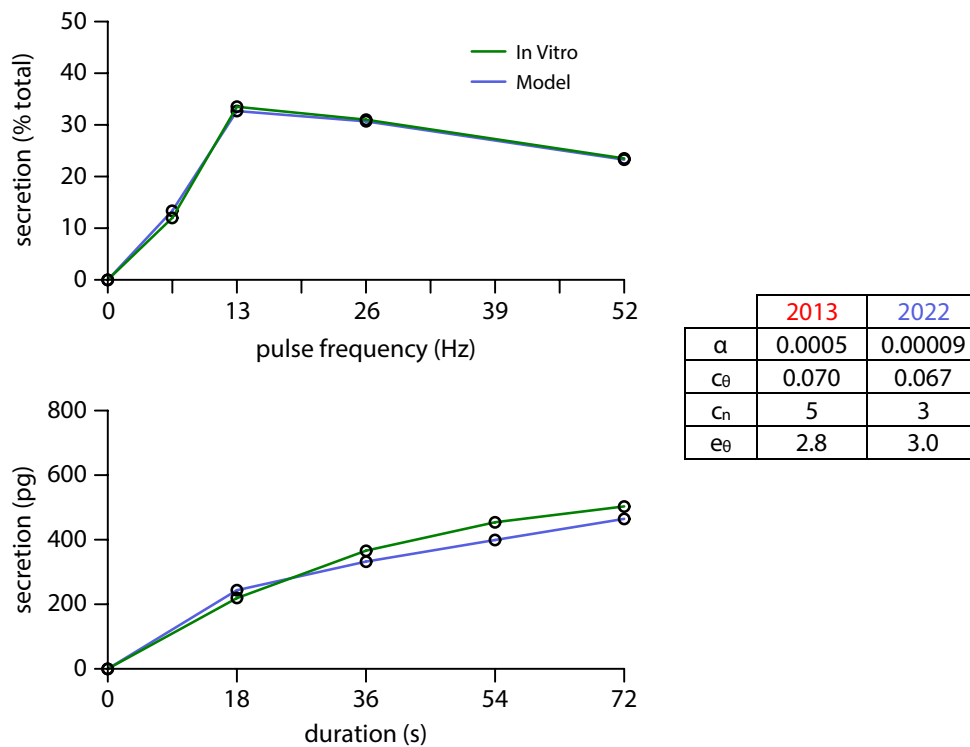

641

642 **Figure 8. Refinement of the secretion model**

643 The quantitative fit of the published secretion model (MacGregor and Leng, 2013) was  
 644 improved using more detailed *in vitro* data and better parameter tuning methods based on recent  
 645 work applying the model to oxytocin neurons (Maicas-Royo, Leng and MacGregor, 2018). The  
 646 model is fitted to data measuring both frequency facilitation (top panel) and fatigue (lower  
 647 panel), simulating the *in vitro* experimental protocols. The changed parameters are given in the  
 648 table. The major adjustment was to reduce  $\alpha$  which scales the rate of secretion to units of pg.  
 649

650 representing the total clearance from the kidneys and other organs. There are no  
 651 equivalently detailed data available for vasopressin, however the vasopressin peptide  
 652 has a very similar size and transport properties, and we assume that the same volumes  
 653 and diffusion can be applied to vasopressin.

654 There are differences however in the clearance rates, mainly due to the added  
 655 component of bound vasopressin cleared at the kidneys. Experiments measuring the  
 656 stable plasma concentrations in response to sustained infusions of oxytocin and  
 657 vasopressin (Robinson *et al.*, 1989) estimated the total clearance rate of vasopressin as  
 658 almost exactly double that of oxytocin. This is consistent with previous experiments  
 659 that show higher oxytocin concentrations in response to the same stimulus (Dogterom,  
 660 Van Wimersma Greidanus and Swabb, 1977; Windle *et al.*, 1993). Thus we modified  
 661 the plasma model by reducing the clearance half-life parameter from 68s to 34s.  
 662 Combined with the diffusion component this produces an overall clearance half-life of



663 ~51s. This matches the estimate of (Ginsburg and Heller, 1953) but is shorter than  
664 other estimates of 120s (Czaczkes and Kleeman, 1964).

665 As well as adding the plasma model we also refitted the existing vasopressin  
666 secretion model (MacGregor and Leng, 2013) using the same technique and  
667 equivalent data as used to fit the oxytocin secretion model (Maicas-Royo, Leng and  
668 MacGregor, 2018). The improved fits (Figure 8) reduced the scaling of secretion per  
669 spike (parameter  $\alpha$ ) by a factor of seven, consistent with the smaller total functional  
670 volume estimate of the improved plasma model (18 ml reduced from 100ml).

671

## 672 **The Synthesis Model**

673 The development of the synthesis model tested many more complex forms  
674 than those presented here. Our aim was to produce a concise and robust model which  
675 is sufficient to make a close qualitative and quantitative match to the available  
676 experimental data. The new model adds only two new variables to the integrated  
677 vasopressin neuron spiking, secretion, and plasma model, representing the rate of  
678 transcription, and the mRNA store (Figure 9).

679 Transcription is upregulated with the osmotic stimulus. Without any  
680 quantitative data available we have not attempted to make any detailed model of the  
681 proposed cAMP or other messenger dependent pathway. The essential property of this  
682 mechanism is that it needs a sustained activity-dependent signal, acting on a much  
683 slower timescale than the rapidly changing electrical activity of the neuron. Informed  
684 by previous experience of signal transduction across timescales in modelling circadian  
685 and circannual rhythms (Macgregor and Lincoln, 2008) this uses a two-step process.  
686 The spiking model's existing activity-dependent  $\text{Ca}^{2+}$  variable ( $C$ ) is used, relative to  
687 basal  $\text{Ca}^{2+}$  ( $C_{rest} = 113 \text{ nM}$ ), to drive the transcription rate ( $T$ ), which increases in  
688 proportion to  $C$  at rate  $0.001 k_T$  units per s, and decays exponentially with half-life  $\lambda_T$   
689 = 1000s:

690

$$691 \quad \frac{dT}{dt} = 0.001 k_T (C - C_{rest}) - \frac{T}{\tau_T}$$

692

$$693 \quad \tau_T = \frac{\lambda_T}{\ln(2)}$$

694

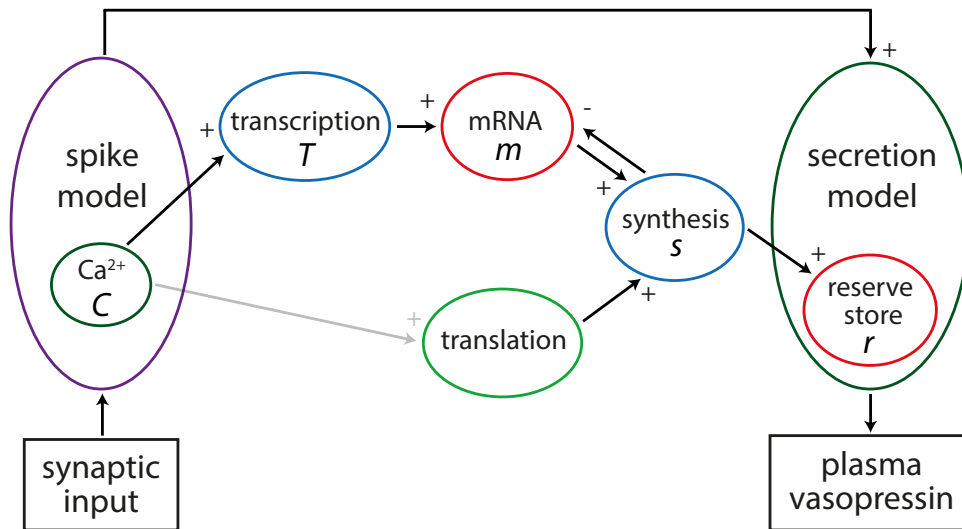

695

696 **Figure 9. The integrated synthesis model**

697 The spiking model, stimulated by synaptic input that encodes osmotic pressure, drives the  
 698 synthesis model through its  $\text{Ca}^{2+}$  variable  $C$ . This regulates the transcription rate  $T$  which  
 699 increases the store of vasopressin mRNA  $m$ . The synthesis rate  $s$  is proportional to  $m$  using a  
 700 fixed translation rate, and also depletes  $m$ . The ghosted link showing activity-dependent  
 701 regulation of translation was not used in the results here. The synthesis model is coupled to  
 702 the secretion model through the charging of its reserve store  $r$ .

703

704

705 The half-life is very approximate, chosen to produce a slowly changing value that  
 706 reaches an equilibrium proportional to the osmotic input stimulus (Figure 2). The  
 707 0.001 scaling factor produces a more convenient scale for parameter  $k_T$ .

708 The mRNA store ( $m$ ) accumulates at a rate proportional to  $T$ . Contrary to the  
 709 Pittsburgh model, it has no explicit exponential decay component, but is depleted in  
 710 proportion to the synthesis rate ( $s$ ). However,  $m$  does decay exponentially when  
 711 translation is at a fixed rate proportional to  $m$  (parameter  $tl_{basal}$ ), as it is in the results  
 712 here.

713

714 
$$\frac{dm}{dt} = s_{scale}T - s$$

715

716 
$$s = tl_{basal}s_{scale}m$$

717

718 The model includes functional timescales ranging from ms to days, and parameter  
 719  $s_{scale}$  is used to scale the rates between the spiking and secretion model and the

720 synthesis model. The results here use a fixed value, but it was convenient for testing  
721 to be able to use this parameter to accelerate the synthesis timescale.

722 The reserve store  $r$  equation from the secretion model (eqn 8 in (MacGregor  
723 and Leng, 2013)) was modified to add the synthesis component:

724

$$725 \quad \frac{dr}{dt} = s_r s - \beta \frac{r}{r_{max}} \text{ where } p < p_{max}; s_r s \text{ otherwise}$$

726

727 where parameter  $s_r$  scales the synthesis units to pg units of stored vasopressin, and  
728 parameter  $\beta$  is the refill rate of the secretion model's releasable pool  $p$ . The default  
729 parameters are given in Table 2. To simulate a transport delay between synthesis and  
730 the store,  $s$  in this equation was replaced  $s_{delay}$ , using the recorded value for  $s$  from an  
731 earlier timestep.

732

733 Table 2: Default Synthesis Model Parameters

| Name        | Description                     | Value (units)               |
|-------------|---------------------------------|-----------------------------|
| $k_T$       | transcription upregulation rate | 0.33 ( $T$ units $s^{-1}$ ) |
| $\lambda_T$ | transcription rate half-life    | 1000 (s)                    |
| $t_{basal}$ | fixed translation rate          | 0.7                         |
| $s_{scale}$ | synthesis time scaling factor   | 0.000003                    |
| $s_r$       | vasopressin scaling factor      | 1.1 (pg per $s$ unit)       |

734

735

### 736 Population Simulation and Heterogeneity

737 The population was simulated by running in parallel 100 copies of the coupled  
738 spiking, secretion, and synthesis model, with the secretion rate outputs forming a  
739 summed input to the single plasma model. A heterogeneous population is generated  
740 by randomly varying the proportional input rates (synaptic input density  $I_{syn}$ ) for each  
741 neuron using a lognormal distribution with mean = 0 and standard deviation = 0.25.

742 This approximates the highly heterogeneous range of spiking rates observed  
743 experimentally (MacGregor and Leng, 2013). The stimulus is then represented by the  
744 population input rate  $I_{pop}$  and individual neuron input rates are generated using:

745

$$746 \quad I_{re} = I_{pop} I_{syn}$$

747

748

## 749 **Implementation**

750       The differential equations were integrated using the first order Euler method.  
751 We can do this safely since the step size (1 ms) inherited from the spiking model is  
752 much smaller than any of the time constants in the model. Using the same fixed time  
753 step makes it simple to couple the synthesis model, and the secretion and plasma  
754 models, to the integrate-and-fire based spiking model. The modelling software was  
755 developed in C++, using the open source wxWidgets graphical interface library. Each  
756 neuron runs as a duplicate integrated spiking, secretion, and synthesis model thread,  
757 with secretion rates feeding into a single plasma model thread. A typical run of the  
758 full model, simulating 22 days of activity for a population of 100 neurons takes ~18  
759 minutes on an AMD Ryzen 9 5900X 12-core processor.

760       The model source code, and software, compiled for Windows PC, are  
761 available at <https://github.com/HypoModel/MagNet/releases>.

762

763

## 764 **Acknowledgement**

765       Professor Gareth Leng is gratefully acknowledged for his contribution to  
766 discussions on the project and advice on editing the manuscript.

767

## 768 **References**

- 769 Carrazana, E.J., Pasioka, K.B. and Majzoub, J.A. (1988) 'The vasopressin mRNA  
770 poly(A) tract is unusually long and increases during stimulation of vasopressin gene  
771 expression in vivo', *Molecular and Cellular Biology*, 8(6), pp. 2267–2274.  
772 doi:10.1128/mcb.8.6.2267-2274.1988.
- 773 Carter, D.A. and Murphy, D. (1989) 'Cyclic nucleotide dynamics in the rat  
774 hypothalamus during osmotic stimulation: in vivo and in vitro studies', *Brain*  
775 *Research*, 487(2), pp. 350–356. doi:10.1016/0006-8993(89)90839-1.
- 776 Czaczkes, J.W. and Kleeman, C.R. (1964) 'The effect of various states of hydration  
777 and the plasma concentration on the turnover of antidiuretic hormone in mammals',  
778 *The Journal of Clinical Investigation*, 43, pp. 1649–1658. doi:10.1172/JCI105040.
- 779 Dogterom, J., Van Wimersma Greidanus, T.B. and Swabb, D.F. (1977) 'Evidence for  
780 the release of vasopressin and oxytocin into cerebrospinal fluid: measurements in  
781 plasma and CSF of intact and hypophysectomized rats', *Neuroendocrinology*, 24(2),  
782 pp. 108–118. doi:10.1159/000122702.
- 783 Emanuel, R.L. *et al.* (1998) 'Vasopressin messenger ribonucleic acid regulation via  
784 the protein kinase A pathway', *Endocrinology*, 139(6), pp. 2831–2837.  
785 doi:10.1210/endo.139.6.6043.

- 786 Fabian, M. *et al.* (1969) ‘The release, clearance and plasma protein binding of  
787 oxytocin in the anaesthetized rat’, *The Journal of Endocrinology*, 43(2), pp. 175–189.  
788 doi:10.1677/joe.0.0430175.
- 789 Fitzsimmons, M.D. *et al.* (1992) ‘Models of neurohypophyseal homeostasis’, *The*  
790 *American journal of physiology*, 262(6 Pt 2), pp. R1121-1130.
- 791 Ginsburg, M. and Heller, H. (1953) ‘The clearance of injected vasopressin from the  
792 circulation and its fate in the body’, *The Journal of Endocrinology*, 9(3), pp. 283–291.  
793 doi:10.1677/joe.0.0090283.
- 794 Ginsburg, M. and Smith, M.W. (1959) ‘The fate of oxytocin in male and female rats’,  
795 *British Journal of Pharmacology and Chemotherapy*, 14, pp. 327–333.  
796 doi:10.1111/j.1476-5381.1959.tb00252.x.
- 797 Gouzènes, L. *et al.* (1998) ‘Vasopressin regularizes the phasic firing pattern of rat  
798 hypothalamic magnocellular vasopressin neurons’, *The Journal of neuroscience: the*  
799 *official journal of the Society for Neuroscience*, 18(5), pp. 1879–1885.
- 800 Greenwood, M. *et al.* (2015) ‘Transcription factor CREB3L1 mediates cAMP and  
801 glucocorticoid regulation of arginine vasopressin gene transcription in the rat  
802 hypothalamus’, *Molecular Brain*, 8(1), p. 68. doi:10.1186/s13041-015-0159-1.
- 803 Jones, C.W. and Pickering, B.T. (1969) ‘Changes in the hormone content of the rat  
804 neurohypophysis induced by substituting 2 per cent saline for drinking water’, *The*  
805 *Journal of Endocrinology*, 43(1), p. vi.
- 806 Jones, C.W. and Pickering, B.T. (1972) ‘Intra-axonal transport and turnover of  
807 neurohypophysial hormones in the rat’, *The Journal of Physiology*, 227(2), pp. 553–  
808 564. doi:10.1113/jphysiol.1972.sp010047.
- 809 Lake, D., Corrêa, S.A.L. and Müller, J. (2019) ‘NMDA receptor-dependent signalling  
810 pathways regulate arginine vasopressin expression in the paraventricular nucleus of  
811 the rat’, *Brain Research*, 1722, p. 146357. doi:10.1016/j.brainres.2019.146357.
- 812 Leng, G. *et al.* (2001) ‘Responses of magnocellular neurons to osmotic stimulation  
813 involves coactivation of excitatory and inhibitory input: an experimental and  
814 theoretical analysis’, *The Journal of Neuroscience*, 21(17), pp. 6967–6977.
- 815 Leng, G. and Ludwig, M. (2008) ‘Neurotransmitters and peptides: whispered secrets  
816 and public announcements’, *The Journal of physiology*, 586(Pt 23), pp. 5625–5632.  
817 doi:10.1113/jphysiol.2008.159103.
- 818 Leng, T., Leng, G. and MacGregor, D.J. (2017) ‘Spike patterning in oxytocin  
819 neurons: Capturing physiological behaviour with Hodgkin-Huxley and integrate-and-  
820 fire models’, *PloS One*, 12(7), p. e0180368. doi:10.1371/journal.pone.0180368.
- 821 MacGregor, D.J., Clayton, T.F. and Leng, G. (2013) ‘Information coding in  
822 vasopressin neurons - The role of asynchronous bistable burst firing’, *Bio Systems*  
823 [Preprint]. doi:10.1016/j.biosystems.2013.03.010.
- 824 MacGregor, D.J. and Leng, G. (2012) ‘Phasic Firing in Vasopressin Cells:

- 825 Understanding Its Functional Significance through Computational Models’, *PLoS*  
826 *Comput Biol*, 8(10), p. e1002740. doi:10.1371/journal.pcbi.1002740.
- 827 MacGregor, D.J. and Leng, G. (2013) ‘Spike Triggered Hormone Secretion in  
828 Vasopressin Cells; a Model Investigation of Mechanism and Heterogeneous  
829 Population Function’, *PLoS Comput Biol*, 9(8), p. e1003187.  
830 doi:10.1371/journal.pcbi.1003187.
- 831 Macgregor, D.J. and Lincoln, G.A. (2008) ‘A physiological model of a circannual  
832 oscillator’, *Journal of biological rhythms*, 23(3), pp. 252–264.  
833 doi:10.1177/0748730408316796.
- 834 Maïcas Royo, J. *et al.* (2016) ‘Oxytocin Neurones: Intrinsic Mechanisms Governing  
835 the Regularity of Spiking Activity’, *Journal of Neuroendocrinology*, 28(4).  
836 doi:10.1111/jne.12358.
- 837 Maïcas Royo, J., Leng, G. and MacGregor, D.J. (2019) ‘The spiking and secretory  
838 activity of oxytocin neurones in response to osmotic stimulation: a computational  
839 model’, *The Journal of Physiology*, 597(14), pp. 3657–3671. doi:10.1113/JP278045.
- 840 Maïcas-Royo, J., Leng, G. and MacGregor, D.J. (2018) ‘A Predictive, Quantitative  
841 Model of Spiking Activity and Stimulus-Secretion Coupling in Oxytocin Neurons’,  
842 *Endocrinology*, 159(3), pp. 1433–1452. doi:10.1210/en.2017-03068.
- 843 Nordmann, J.J. (1985) ‘Hormone content and movement of neurosecretory granules in  
844 the rat neural lobe during and after dehydration’, *Neuroendocrinology*, 40(1), pp. 25–  
845 32. doi:10.1159/000124047.
- 846 Roberts, M.M. *et al.* (1991) ‘Vasopressin transport regulation is coupled to the  
847 synthesis rate’, *Neuroendocrinology*, 53(4), pp. 416–422. doi:10.1159/000125750.
- 848 Robertson, G.L., Shelton, R.L. and Athar, S. (1976) ‘The osmoregulation of  
849 vasopressin’, *Kidney International*, 10(1), pp. 25–37. doi:10.1038/ki.1976.76.
- 850 Robinson, A.G. *et al.* (1989) ‘Total translation of vasopressin and oxytocin in  
851 neurohypophysis of rats’, *The American Journal of Physiology*, 257(1 Pt 2), pp.  
852 R109–117. doi:10.1152/ajpregu.1989.257.1.R109.
- 853 Robinson, A.G. and Fitzsimmons, M.D. (1993) ‘Vasopressin homeostasis:  
854 coordination of synthesis, storage and release’, *Regulatory Peptides*, 45(1–2), pp.  
855 225–230. doi:10.1016/0167-0115(93)90210-y.
- 856 Russell, J.T., Brownstein, M.J. and Gainer, H. (1981) ‘Time course of appearance and  
857 release of [35S]cysteine labelled neurophysins and peptides in the neurohypophysis’,  
858 *Brain Research*, 205(2), pp. 299–311. doi:10.1016/0006-8993(81)90341-3.
- 859 Sabatier, N. *et al.* (2004) ‘Phasic spike patterning in rat supraoptic neurones in vivo  
860 and in vitro’, *The Journal of Physiology*, 558(Pt 1), pp. 161–180.  
861 doi:10.1113/jphysiol.2004.063982.
- 862 Scott, V. and Brown, C.H. (2010) ‘State-dependent plasticity in vasopressin neurones:  
863 dehydration-induced changes in activity patterning’, *Journal of neuroendocrinology*,

- 864 22(5), pp. 343–354. doi:10.1111/j.1365-2826.2010.01961.x.
- 865 Sherman, T.G., McKelvy, J.F. and Watson, S.J. (1986) ‘Vasopressin mRNA  
866 regulation in individual hypothalamic nuclei: a northern and in situ hybridization  
867 analysis’, *The Journal of Neuroscience: The Official Journal of the Society for*  
868 *Neuroscience*, 6(6), pp. 1685–1694.
- 869 Sladek, C.D. *et al.* (1996) ‘cAMP regulation of vasopressin mRNA content in  
870 hypothalamo-neurohypophysial explants’, *The American Journal of Physiology*,  
871 271(3 Pt 2), pp. R554-560. doi:10.1152/ajpregu.1996.271.3.R554.
- 872 Svane, P.C. *et al.* (1995) ‘Effect of hypoosmolality on the abundance, poly(A) tail  
873 length and axonal targeting of arginine vasopressin and oxytocin mRNAs in rat  
874 hypothalamic magnocellular neurons’, *FEBS letters*, 373(1), pp. 35–38.  
875 doi:10.1016/0014-5793(95)01008-3.
- 876 Verbalis, J.G., Baldwin, E.F. and Robinson, A.G. (1986) ‘Osmotic regulation of  
877 plasma vasopressin and oxytocin after sustained hyponatremia’, *The American*  
878 *Journal of Physiology*, 250(3 Pt 2), pp. R444-451.  
879 doi:10.1152/ajpregu.1986.250.3.R444.
- 880 Walters, J.K. and Hatton, G.I. (1974) ‘Supraoptic neuronal activity in rats during five  
881 days of water deprivation’, *Physiology & Behavior*, 13(5), pp. 661–667.  
882 doi:10.1016/0031-9384(74)90237-6.
- 883 Windle, R.J. *et al.* (1993) ‘Patterns of neurohypophysial hormone release during  
884 dehydration in the rat’, *The Journal of Endocrinology*, 137(2), pp. 311–319.  
885 doi:10.1677/joe.0.1370311.
- 886 Wong, L.-F. *et al.* (2003) ‘cAMP-dependent protein kinase A mediation of  
887 vasopressin gene expression in the hypothalamus of the osmotically challenged rat’,  
888 *Molecular and Cellular Neurosciences*, 24(1), pp. 82–90. doi:10.1016/s1044-  
889 7431(03)00123-4.
- 890 Young, T.K. and Van Dyke, H.B. (1968) ‘Repletion of vasopressin and oxytocin in  
891 the posterior lobe of the pituitary gland of the rat’, *The Journal of Endocrinology*,  
892 40(3), pp. 337–342. doi:10.1677/joe.0.0400337.
- 893 Yue, C. *et al.* (2008) ‘Differential kinetics of oxytocin and vasopressin heteronuclear  
894 RNA expression in the rat supraoptic nucleus in response to chronic salt loading in  
895 vivo’, *Journal of Neuroendocrinology*, 20(2), pp. 227–232. doi:10.1111/j.1365-  
896 2826.2007.01640.x.
- 897 Zingg, H.H., Lefebvre, D. and Almazan, G. (1986) ‘Regulation of vasopressin gene  
898 expression in rat hypothalamic neurons. Response to osmotic stimulation’, *The*  
899 *Journal of Biological Chemistry*, 261(28), pp. 12956–12959.
- 900 Zingg, H.H., Lefebvre, D.L. and Almazan, G. (1988) ‘Regulation of poly(A) tail size  
901 of vasopressin mRNA’, *The Journal of Biological Chemistry*, 263(23), pp. 11041–  
902 11043.
- 903
