# Supplementary material for: Modelling vasopressin synthesis and storage dynamics during prolonged osmotic challenge and recovery based on activity dependent upregulation of mRNA transcription
Source: bioRxiv or medRxiv preprint supplement (doi:10.1101/2022.06.27.497653), 2022-07-07

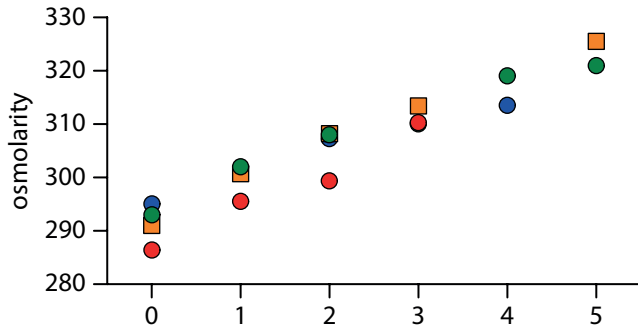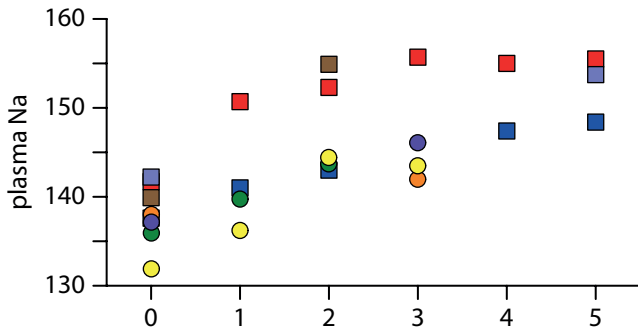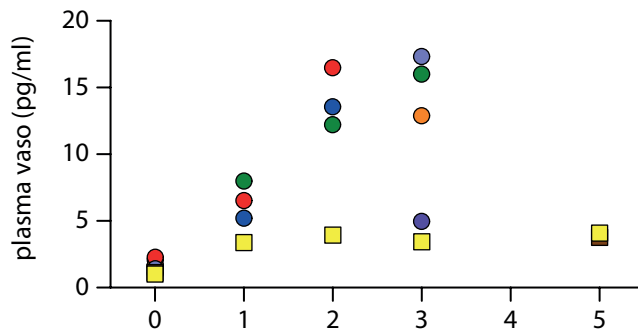

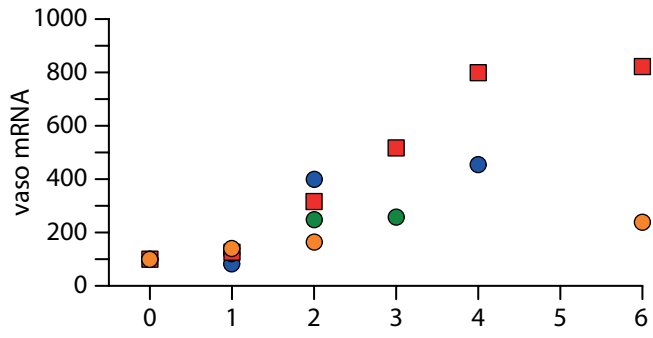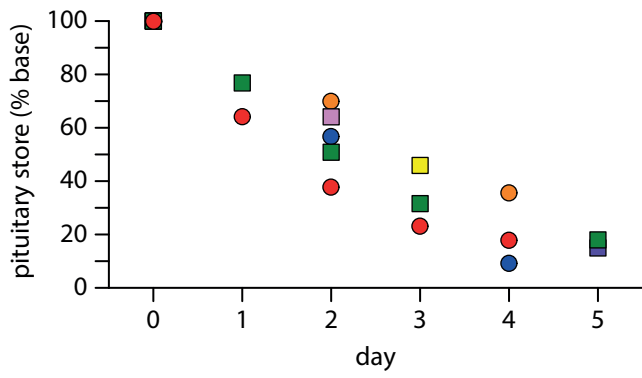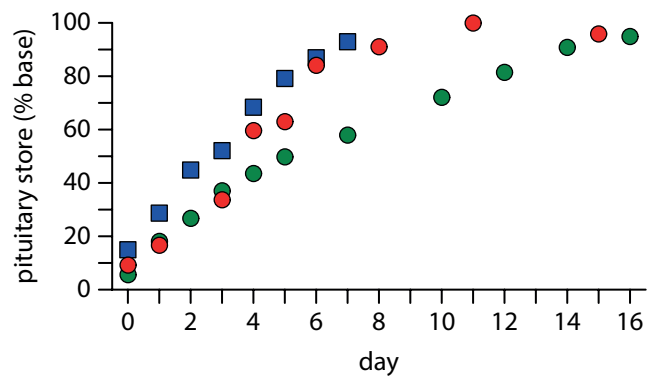

Supplement: Supplementary file [file media-1.pdf]
